# Supplementary material for: Metal–organic frameworks of manganese(ii) 4,4′-biphenyldicarboxylates: crystal structures, hydrogen adsorption, and magnetism properties
Source: Royal Society of Chemistry journal article supplement (doi:10.1039/b916168f), 2009-10-13
Supplement: b916168f.pdf [file b916168f.pdf]

*Electronic Supplementary Information*

**Metal-organic frameworks of manganese(II) 4,4'-biphenyldicarboxylates: Crystal structures, hydrogen adsorption, and magnetism properties**

Rui-Qin Zhong, Ru-Qiang Zou, Miao Du, Tetsuya Yamada, Goro Maruta, Sadamu Takeda, Jing Li, and Qiang Xu

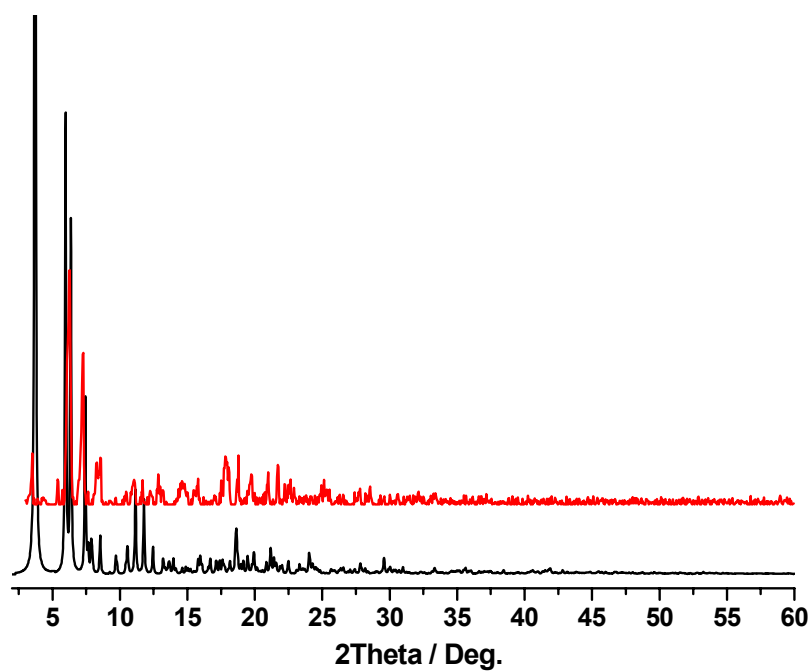

**Fig. S1** PXRD patterns of **1**: red represents as made and black represent simulated one from crystal data.

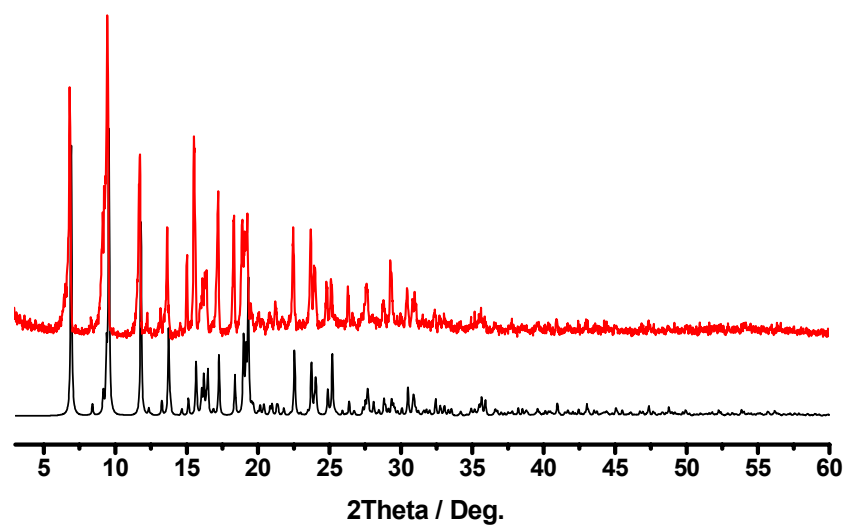

**Fig. S2** PXRD patterns of **2**: red represents as made and black represent simulated one from crystal data.
